# Supplementary material
Source: publisher figshare collection journal article supplement (https://acs.figshare.com/ndownloader/files/5671134)
Supplement: Supplementary file 1 [file 5671134]

## SUPPORTING INFORMATION FOR WORLD WIDE WEB EDITION

*Substrate analogue synthesis.*

The synthesis of *para*-substituted L-glutamyl  $\gamma$ -anilide substrate analogues follows a general method based on the protocol published by Lindsay and Whitaker<sup>1</sup> as shown in Scheme 1S. Reported melting points were recorded on a Thomas-Hoover Uni-melt apparatus and are uncorrected. <sup>1</sup>H NMR and <sup>13</sup>C NMR spectra were recorded on a Bruker AMX300 (300 MHz) and a Bruker AMXR400 (400 MHz) NMR spectrometer, respectively. Mass spectra were recorded on a Micromass 1212 spectrometer.

Scheme 1S

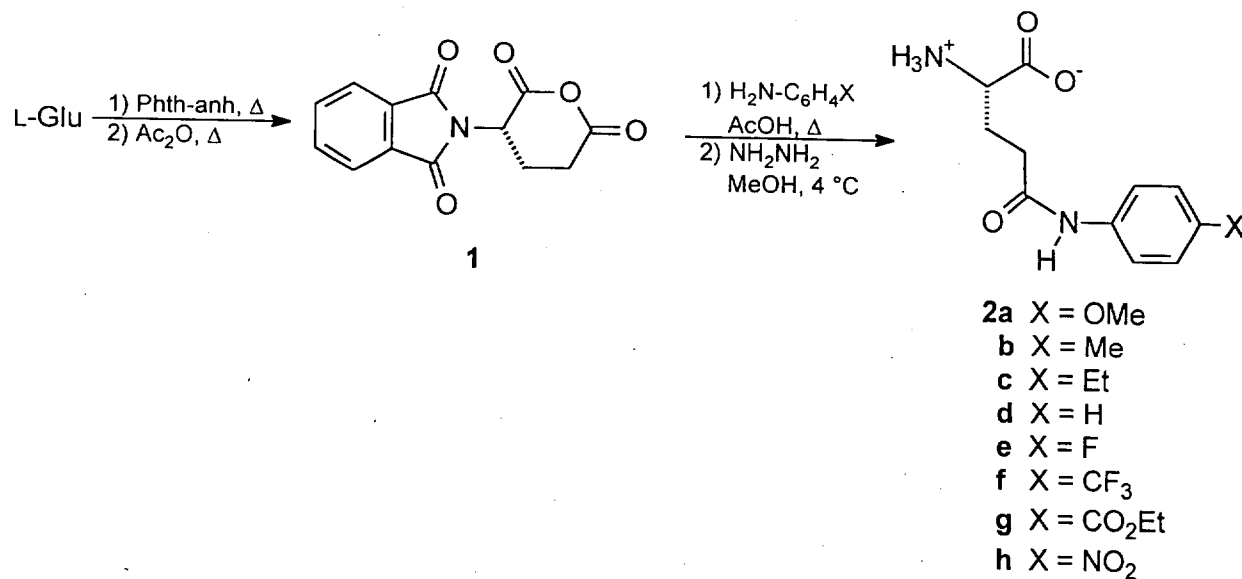

<sup>1</sup> Lindsay, H. and Whitaker, J. F. (1975) *Org. Proc. Prep. Int.* 89-91.

*Synthesis of N-phthalyl L-glutamic acid anhydride 1.*

A quantity of 5 g (33.7 mmol) of phthalic anhydride and 5 g (33.7 mmol) of L-glutamic acid were heated together at 180 °C with slight stirring to boiling, whereupon the temperature was reduced to 145 °C for 30 minutes. The reaction mixture was then cooled to 100-105 °C, 6 mL of acetic anhydride was added and the solution was allowed to react for an additional 10 minutes. Then 20 mL of xylene was added to the mixture and it was refrigerated at 4 °C for 12 hours. *N*-phthalyl L-glutamic acid anhydride was recovered by vacuum filtration as large white crystals (4.44 g, 50 %; mp 188-192 °C, lit.<sup>1</sup> 199-201 °C). <sup>1</sup>H NMR (CDCl<sub>3</sub>) δ 2.20 (m, 1H), 2.95 (m, 2H), 3.20 (m, 1H), 5.15 (q, *J* = 4.5 Hz, 1H), 7.88 (m, 4H). <sup>13</sup>C NMR (DMSO-*d*<sub>6</sub>) δ 21.47, 30.48, 48.73, 124.60, 132.27, 135.99, 167.34, 167.73, 171.40, 174.79. MS (M+H) 260.0

*Synthesis of para-substituted L-glutamyl anilides 2a-h.*

General Procedure: A quantity of 290 mg (1.1 mmol) of *N*-phthalyl L-glutamic acid anhydride and 1 mmol of a given aniline were added to either 10 mL of glacial acetic acid or 10 mL of benzene with 500 µL of glacial acetic acid. The mixture was heated to reflux with stirring until the reaction was complete. Solvents were removed under reduced pressure and the residue was washed three times with *n*-propanol to eliminate traces of acetic acid. The *N*-phthalyl L-glutamyl *para*-substituted anilide product was recovered as a white powder by evaporation of the *n*-propanol. Deprotection was carried out directly without purification.

To the flask containing the protected  $\gamma$ -glutamyl anilide was added 10 mL of methanol, followed by gentle heating. The mixture was filtered to remove any solid that remained undissolved, and to the filtrate was then added 300 µL of hydrazine (~ 12 eq or to pH 8-8.5).

The mixture was stirred at room temperature for two hours and then stored at 4 °C overnight. The methanol was evaporated and 10 mL of 0.5 N HCl was added. The mixture was heated gently and the product that did not dissolve was removed by filtration. The filtrate was extracted with ethyl acetate (2 × 10 mL) and the aqueous phase was neutralized with sodium bicarbonate to pH ~5 and kept at 4°C for 12 hours. The resulting crystals were then collected by vacuum filtration.

*Synthesis of L-glutamyl( $\gamma$ -p-methoxyanilide) 2a.*

White powder (127 mg, 51 %; mp 215-217 °C).  $^1\text{H}$  NMR ( $\text{CD}_3\text{OD}$ )  $\delta$  1.30 (s, 3H), 2.15 (q,  $J$  = 8.6 Hz, 2H), 2.60 (t,  $J$  = 7.1 Hz, 2H), 3.60 (m, 1H), 3.74 (s, 3H), 6.85 (dd,  $J$  = 3.6, 10.7 Hz, 2H), 7.40 (dd,  $J$  = 3.6, 10.7 Hz, 2H);  $^{13}\text{C}$  NMR ( $\text{DMSO}-d_6$ )  $\delta$  25.69, 30.15, 56.02, 56.25, 115.48, 116.09, 143.06, 151.77, 175.68, 178.07. HRMS ( $\text{M}+\text{H}$ ) calc. 253.11884, found 253.11770.

*Synthesis of L-glutamyl( $\gamma$ -p-methylanilide) 2b.*

White powder (100 mg, 42 %; mp 208-210 °C).  $^1\text{H}$  NMR ( $\text{CD}_3\text{OD}$ )  $\delta$  2.19 (q,  $J$  = 6.4 Hz, 2H), 2.30 (s, 3H), 2.62 (t,  $J$  = 7.0 Hz, 2H), 3.65 (t,  $J$  = 6.7 Hz, 1H), 7.10 (dd,  $J$  = 1.2, 9.5 Hz, 2H), 7.40 (dd,  $J$  = 1.2, 9.5 Hz, 2H);  $^{13}\text{C}$  NMR ( $\text{DMSO}-d_6$ )  $\delta$  21.11, 25.53, 30.13, 55.96, 115.13, 125.05, 130.06, 146.87, 175.61, 178.08. HRMS ( $\text{M}+\text{H}$ ) calc. 237.12392, found 237.12420.

*Synthesis of L-glutamyl( $\gamma$ -p-ethylanilide) 2c.*

White powder (158 mg, 64 %; mp 204-206 °C)  $^1\text{H}$  NMR ( $\text{DMSO}-d_6$ )  $\delta$  1.13 (t,  $J$  = 7.6 Hz, 3H), 2.31 (m, 2H), 2.52 (m, 4H), 3.49 (m, 1H), 7.07 (d,  $J$  = 8.2 Hz, 2H), 7.48 (d,  $J$  = 7.7 Hz, 2H)  $^{13}\text{C}$

NMR (DMSO- $d_6$ )  $\delta$  16.07, 26.04, 27.91, 31.81, 51.86, 119.65, 128.25, 137.25, 139.30, 169.99, 171.10 MS (M+H) calc. 251.13957, obtained 251.13880

*Synthesis of L-glutamyl( $\gamma$ -anilide) 2d.*

White crystals (151 mg, 68 %; mp 210-212 °C).  $^1\text{H}$  NMR (CD $_3$ OD)  $\delta$  2.15 (q,  $J$  = 5.0 Hz, 2H), 2.55 (t,  $J$  = 3.6 Hz, 2H), 3.80 (t,  $J$  = 4.3 Hz, 1H), 7.25 (m, 1H), 7.42 (d,  $J$  = 4.6 Hz, 4H);  $^{13}\text{C}$  NMR (DMSO- $d_6$ )  $\delta$  25.47, 29.95, 55.81, 114.95, 116.71, 129.81, 149.33, 175.84, 178.56. HRMS (M+H) calc. 223.10826, found 223.10890.

*Synthesis of L-glutamyl( $\gamma$ -p-fluoroanilide) 2e.*

White powder (66 mg, 25 %; mp 210 °C)  $^1\text{H}$  NMR (DMSO- $d_6$ )  $\delta$  1.93 (m, 2H), 2.45 (m, 2H), 3.24 (m, 1H), 7.12 (t,  $J$  = 8.2 Hz, 2H), 7.60 (dd,  $J$  = 4.1, 8.2 Hz, 2H)  $^{13}\text{C}$  NMR (DMSO- $d_6$ )  $\delta$  27.64, 33.24, 53.94, 115.34, 115.64, 121.00, 121.10, 136.21, 171.19. MS (M+H) calc. 241.09885, obtained 241.09820.

*Synthesis of L-glutamyl( $\gamma$ -p-trifluoromethylanilide) 2f.*

White powder (107 mg, 37 %; mp 204-205 °C).  $^1\text{H}$  NMR (CD $_3$ OD)  $\delta$  2.15 (q,  $J$  = 6.4 Hz, 2H), 2.65 (t,  $J$  = 7.9 Hz, 2H), 3.65 (t,  $J$  = 2.9 Hz, 1H), 7.55 (dd,  $J$  = 0.5, 7.1 Hz, 2H), 7.75 (dd,  $J$  = 0.5, 7.1 Hz, 2H);  $^{13}\text{C}$  NMR (DMSO- $d_6$ )  $\delta$  24.96, 29.41, 55.09, 113.29, 119.19, 126.56, 126.61, 152.63, 174.87, 177.34. HRMS (M+H) calc. 291.09564, found 291.09630.

*Synthesis of L-glutamyl( $\gamma$ -p-ethoxycarbonylanilide) 2g.*

White powder (108 mg, 33 %; mp 203-204 °C).  $^1\text{H}$  NMR (DMSO- $d_6$ )  $\delta$  1.30 (t,  $J = 7.3$  Hz, 3H), 1.92 (q,  $J = 7.7$  Hz, 2H), 2.53 (t,  $J = 7.3$  Hz, 2H) 3.28 (t,  $J = 7.3$  Hz, 1H), 4.28 (q,  $J = 7.3$  Hz, 2H), 7.72, (d,  $J = 8.2$  Hz, 2H), 7.89 (d,  $J = 8.2$  Hz, 2H).  $^{13}\text{C}$  NMR (DMSO- $d_6$ ) 15.20, 27.70, 33.95, 54.23, 61.25, 119.20, 124.71, 131.06, 144.59, 157.88, 166.22, 172.37. HRMS (M+H) calc. 295.12939, found 295.13040.

*Synthesis of L-glutamyl( $\gamma$ -p-nitroanilide) 2h.*

Yellow powder (190 mg, 71 %; mp 186-188 °C, lit. 186-188 °C (24)).  $^1\text{H}$  NMR (CD $_3$ OD)  $\delta$  2.20 (q,  $J = 2.4$  Hz, 2H), 2.68 (t,  $J = 7.9$  Hz, 2H), 3.65 (t,  $J = 4.0$  Hz, 1H), 7.80 (dd,  $J = 1.5, 9.5$  Hz, 2H), 8.20 (dd,  $J = 1.5, 9.5$  Hz, 2H);  $^{13}\text{C}$  NMR (DMSO- $d_6$ )  $\delta$  27.62, 33.82, 54.44, 119.68, 127.32, 142.77, 146.69, 172.39, 172.34. HRMS (M+H) calc. 268.09335, found 268.09260.

*Colorimetric determination of aniline concentration.*

A test tube was charged with 500  $\mu\text{L}$  of 0.1 M Tris-HCl buffer (pH 8.0), 500  $\mu\text{L}$  water, 500  $\mu\text{L}$  of 40 % trichloroacetic acid (TCA) and 1.6 - 32  $\mu\text{L}$  of a 2.5 mM aniline solution prepared by dissolving the respective aniline in water by the addition of a few drops of 2 N HCl. The volume in the test tube was completed to 2 mL with the addition of 468 – 498.4  $\mu\text{L}$  water. To this was added 500  $\mu\text{L}$  of a freshly prepared sodium nitrite solution (4 mg/mL  $\text{H}_2\text{O}$ ), and the reaction was allowed to proceed for 3 minutes. After this time, 500  $\mu\text{L}$  of an ammonium sulfamate solution (20 mg/mL  $\text{H}_2\text{O}$ ) was added and the solution was allowed to stand for 2 minutes. Finally, 1 mL of a solution of *N*-(1-naphtyl)ethylenediamine dihydrochloride (1.5 mg/mL ethanol) was added, and the color of the solution was allowed to develop. The time and temperature of this color development vary slightly according to the aniline concerned, as reported in Table 1S. The absorbance of the final solution was read at the wavelength ( $\lambda$ ) shown in Table 1S, and a graph of absorbance versus concentration was prepared. The slope of this graph gives the apparent extinction coefficient ( $\epsilon^{\text{app}}$ ) of the corresponding solutions of diazotized aniline, determined under these conditions, as reported in Table 1S.

**Table 1S:** Experimental conditions employed for colorimetric determination of the concentration of a series of *para*-substituted anilines and the apparent extinction coefficients of their respective diazo dyes determined under these conditions.

| Analyte                          | $\epsilon^{\text{app } a}$<br>( $\text{mM}^{-1}\text{cm}^{-1}$ ) | $\lambda$<br>(nm) | Temp.<br>(°C) | Time<br>(min) |
|----------------------------------|------------------------------------------------------------------|-------------------|---------------|---------------|
| <i>p</i> -methoxyaniline         | $15.3 \pm 0.3$<br>( $7.9 \pm 0.7$ )                              | 583               | 37            | 30            |
| <i>p</i> -methylaniline          | $24.7 \pm 0.3$                                                   | 567               | 25            | 15            |
| <i>p</i> -ethylaniline           | $33.1 \pm 0.4$                                                   | 572               | 25            | 15            |
| aniline                          | $45.1 \pm 0.3$<br>( $37.5 \pm 0.4$ )                             | 560               | 25            | 15            |
| <i>p</i> -fluoroaniline          | $86.0 \pm 1.6$                                                   | 558               | 25            | 10            |
| <i>p</i> -trifluoromethylaniline | $67.1 \pm 0.3$                                                   | 546               | 25            | 10            |
| <i>p</i> -ethoxycarbonylaniline  | $114 \pm 1$                                                      | 551               | 25            | 10            |
| <i>p</i> -nitroaniline           | $57.3 \pm 0.4$<br>( $52.7 \pm 0.6$ )                             | 560               | 25            | 10            |

<sup>a</sup> Values in parentheses were determined from solutions prepared in D<sub>2</sub>O.

*Kinetic data.*

**Table 1S:** Reaction rates of GGT, in the presence of 20 mM Gly-Gly at 37 °C at pH 8.0 (0.1 M Tris-HCl), with L-Glu( $\gamma$ -*p*-methoxyanilide) as a function of substrate concentration.

| [L-Glu( $\gamma$ - <i>p</i> -methoxyanilide)] ( $\mu$ M) | Rate ( $\text{M}\cdot\text{min}^{-1}\cdot\text{mg}^{-1}$ ) <sup>a</sup> |
|----------------------------------------------------------|-------------------------------------------------------------------------|
| 50                                                       | 0.0068                                                                  |
| 100                                                      | 0.0121                                                                  |
| 200                                                      | 0.0228                                                                  |
| 500                                                      | 0.0470                                                                  |
| 1000                                                     | 0.0684                                                                  |
| 2000                                                     | 0.0896                                                                  |

<sup>a</sup> Average of duplicate values. Experimental error is estimated at  $\pm 10\%$ .



**Table 2S:** Reaction rates of GGT, in the presence of 20 mM Gly-Gly at 37 °C at pH 8.0 (0.1 M Tris-HCl), with L-Glu( $\gamma$ -*p*-methylanilide) as a function of substrate concentration.

| [L-Glu( $\gamma$ - <i>p</i> -methylanilide)] ( $\mu$ M) | Rate ( $\text{M}\cdot\text{min}^{-1}\cdot\text{mg}^{-1}$ ) <sup>a</sup> |
|---------------------------------------------------------|-------------------------------------------------------------------------|
| 50                                                      | 0.0065                                                                  |
| 100                                                     | 0.0129                                                                  |
| 200                                                     | 0.0255                                                                  |
| 500                                                     | 0.0506                                                                  |
| 1000                                                    | 0.0685                                                                  |
| 2000                                                    | 0.0830                                                                  |

<sup>a</sup> Average of duplicate values. Experimental error is estimated at  $\pm 10\%$ .

**Table 3S:** Reaction rates of GGT, in the presence of 20 mM Gly-Gly at 37 °C at pH 8.0 (0.1 M Tris-HCl), with L-Glu( $\gamma$ -*p*-ethylanilide) as a function of substrate concentration.

| [L-Glu( $\gamma$ - <i>p</i> -ethylanilide)] ( $\mu$ M) | Rate ( $\text{M}\cdot\text{min}^{-1}\cdot\text{mg}^{-1}$ ) <sup>a</sup> |
|--------------------------------------------------------|-------------------------------------------------------------------------|
| 100                                                    | 0.0040                                                                  |
| 200                                                    | 0.0124                                                                  |
| 500                                                    | 0.0293                                                                  |
| 750                                                    | 0.0434                                                                  |
| 1000                                                   | 0.0516                                                                  |
| 2000                                                   | 0.0467                                                                  |

<sup>a</sup> Experimental error is estimated at  $\pm 10\%$ .

**Table 4S:** Reaction rates of GGT, in the presence of 20 mM Gly-Gly at 37 °C at pH 8.0 (0.1 M Tris-HCl), with L-Glu( $\gamma$ -anilide) as a function of substrate concentration.

| [L-Glu( $\gamma$ -anilide)] ( $\mu$ M) | Rate ( $\text{M}\cdot\text{min}^{-1}\cdot\text{mg}^{-1}$ ) <sup>a</sup> |
|----------------------------------------|-------------------------------------------------------------------------|
| 50                                     | 0.0056                                                                  |
| 100                                    | 0.0105                                                                  |
| 200                                    | 0.0208                                                                  |
| 500                                    | 0.0351                                                                  |
| 1000                                   | 0.0482                                                                  |
| 2000                                   | 0.0596                                                                  |

<sup>a</sup> Average of duplicate values. Experimental error is estimated at  $\pm 10\%$ .

**Table 5S:** Reaction rates of GGT, in the presence of 20 mM Gly-Gly at 37 °C at pH 8.0 (0.1 M Tris-HCl), with L-Glu( $\gamma$ -*p*-fluoroanilide) as a function of substrate concentration.

| [L-Glu( $\gamma$ - <i>p</i> -fluoroanilide)] ( $\mu$ M) | Rate ( $\text{M}\cdot\text{min}^{-1}\cdot\text{mg}^{-1}$ ) <sup>a</sup> |
|---------------------------------------------------------|-------------------------------------------------------------------------|
| 50                                                      | 0.0026                                                                  |
| 100                                                     | 0.0052                                                                  |
| 500                                                     | 0.0154                                                                  |
| 1000                                                    | 0.0299                                                                  |
| 2000                                                    | 0.0375                                                                  |
| 3000                                                    | 0.0387                                                                  |

<sup>a</sup> Experimental error is estimated at  $\pm 10\%$ .

**Table 6S:** Reaction rates of GGT, in the presence of 20 mM Gly-Gly at 37 °C at pH 8.0 (0.1 M Tris-HCl), with L-Glu( $\gamma$ -*p*-trifluoromethylanilide) as a function of substrate concentration.

| [L-Glu( $\gamma$ - <i>p</i> -trifluoromethylanilide)] ( $\mu$ M) | Rate ( $\text{M}\cdot\text{min}^{-1}\cdot\text{mg}^{-1}$ ) <sup>a</sup> |
|------------------------------------------------------------------|-------------------------------------------------------------------------|
| 50                                                               | 0.0059                                                                  |
| 100                                                              | 0.0114                                                                  |
| 200                                                              | 0.0216                                                                  |
| 500                                                              | 0.0414                                                                  |
| 1000                                                             | 0.0679                                                                  |
| 2000                                                             | 0.0770                                                                  |

<sup>a</sup> Average of duplicate values. Experimental error is estimated at  $\pm 10\%$ .

**Table 7S:** Reaction rates of GGT, in the presence of 20 mM Gly-Gly at 37 °C at pH 8.0 (0.1 M Tris-HCl), with L-Glu( $\gamma$ -*p*-ethoxycarbonylanilide) as a function of substrate concentration.

| [L-Glu( $\gamma$ - <i>p</i> -ethoxycarbonylanilide)] ( $\mu$ M) | Rate ( $\text{M}\cdot\text{min}^{-1}\cdot\text{mg}^{-1}$ ) <sup>a</sup> |
|-----------------------------------------------------------------|-------------------------------------------------------------------------|
| 50                                                              | 0.0061                                                                  |
| 100                                                             | 0.0085                                                                  |
| 500                                                             | 0.0340                                                                  |
| 1000                                                            | 0.0545                                                                  |
| 2000                                                            | 0.0707                                                                  |

<sup>a</sup> Experimental error is estimated at  $\pm 10\%$ .

**Table 8S:** Reaction rates of GGT, in the presence of 20 mM Gly-Gly at 37 °C at pH 8.0 (0.1 M Tris-HCl), with L-Glu( $\gamma$ -*p*-nitroanilide) as a function of substrate concentration.

| [L-Glu( $\gamma$ - <i>p</i> -nitroanilide)] ( $\mu$ M) | Rate ( $\text{M}\cdot\text{min}^{-1}\cdot\text{mg}^{-1}$ ) <sup>a</sup> |
|--------------------------------------------------------|-------------------------------------------------------------------------|
| 50                                                     | 0.0152                                                                  |
| 100                                                    | 0.0307                                                                  |
| 200                                                    | 0.0495                                                                  |
| 500                                                    | 0.0868                                                                  |
| 1000                                                   | 0.123                                                                   |
| 2000                                                   | 0.136                                                                   |

<sup>a</sup> Average of duplicate values. Experimental error is estimated at  $\pm 10\%$ .

**Table 9S:** Reaction rates of GGT in D<sub>2</sub>O, in the presence of 20 mM Gly-Gly at 37 °C at pD 8.0 (0.1 M Tris-DCl), with L-Glu( $\gamma$ -*p*-methoxyanilide) as a function of substrate concentration.

| [L-Glu( $\gamma$ - <i>p</i> -methoxyanilide)] ( $\mu$ M) | Rate ( $\text{M}\cdot\text{min}^{-1}\cdot\text{mg}^{-1}$ ) <sup>a</sup> |
|----------------------------------------------------------|-------------------------------------------------------------------------|
| 50                                                       | 0.0048                                                                  |
| 100                                                      | 0.0086                                                                  |
| 200                                                      | 0.0144                                                                  |
| 500                                                      | 0.0308                                                                  |
| 1000                                                     | 0.0538                                                                  |
| 2000                                                     | 0.0773                                                                  |

<sup>a</sup> Experimental error is estimated at  $\pm 10\%$ .



**Table 10S:** Reaction rates of GGT in D<sub>2</sub>O, in the presence of 20 mM Gly-Gly at 37 °C at pD 8.0 (0.1 M Tris-DCl), with L-Glu( $\gamma$ -anilide) as a function of substrate concentration.

| [L-Glu( $\gamma$ -anilide)] ( $\mu$ M) | Rate (M $\cdot$ min <sup>-1</sup> $\cdot$ mg <sup>-1</sup> ) <sup>a</sup> |
|----------------------------------------|---------------------------------------------------------------------------|
| 50                                     | 0.0082                                                                    |
| 100                                    | 0.0151                                                                    |
| 200                                    | 0.0240                                                                    |
| 500                                    | 0.0393                                                                    |
| 1000                                   | 0.0485                                                                    |
| 2000                                   | 0.0524                                                                    |

<sup>a</sup> Experimental error is estimated at  $\pm 10\%$ .

**Table 11S:** Reaction rates of GGT in D<sub>2</sub>O, in the presence of 20 mM Gly-Gly at 37 °C at pD 8.0 (0.1 M Tris-DCl), with L-Glu( $\gamma$ -*p*-nitroanilide) as a function of substrate concentration.

| [L-Glu( $\gamma$ - <i>p</i> -nitroanilide)] ( $\mu$ M) | Rate (M $\cdot$ min <sup>-1</sup> $\cdot$ mg <sup>-1</sup> ) <sup>a</sup> |
|--------------------------------------------------------|---------------------------------------------------------------------------|
| 50                                                     | 0.0133                                                                    |
| 100                                                    | 0.0218                                                                    |
| 200                                                    | 0.0431                                                                    |
| 500                                                    | 0.0562                                                                    |
| 1000                                                   | 0.0677                                                                    |
| 2000                                                   | 0.0769                                                                    |

<sup>a</sup> Experimental error is estimated at  $\pm 10\%$ .

**Table 12S:** Kinetic parameters ( $k_{\text{cat}}$ ,  $K_{\text{M}}$ ) obtained according to Equation 4 for the reaction of GGT in  $\text{D}_2\text{O}$ , in the presence of 20 mM Gly-Gly at 37 °C at pD 8.0 (0.1 M Tris-DCI), with substrates **2a**, **2d**, and **2h** (see Methods) and kinetic isotope effects ( $k_{\text{cat}}^{\text{H}_2\text{O}} / k_{\text{cat}}^{\text{D}_2\text{O}}$ ).

| Substrate                                   | $k_{\text{cat}}^a$<br>( $\text{s}^{-1}$ ) | $K_{\text{M}}^a$<br>( $\mu\text{M}$ ) | $k_{\text{cat}}^{\text{H}_2\text{O}} / k_{\text{cat}}^{\text{D}_2\text{O}}$ |
|---------------------------------------------|-------------------------------------------|---------------------------------------|-----------------------------------------------------------------------------|
| L-Glu( $\gamma$ - <i>p</i> -methoxyanilide) | 671                                       | 475                                   | 1.45                                                                        |
| L-Glu( $\gamma$ -anilide)                   | 438                                       | 301                                   | 1.03                                                                        |
| L-Glu( $\gamma$ - <i>p</i> -nitroanilide)   | 629                                       | 236                                   | 1.83                                                                        |

<sup>a</sup> Experimental error is estimated at  $\pm 10\%$ .

**Table 13S:** Reaction rates of GGT, in the presence of 20 mM Gly-Gly at 37 °C at pH 7.0 (0.1 M MOPS), with L-Glu( $\gamma$ -*p*-nitroanilide) as a function of substrate concentration.

| [L-Glu( $\gamma$ - <i>p</i> -nitroanilide)] ( $\mu$ M) | Rate ( $\text{M}\cdot\text{min}^{-1}\cdot\text{mg}^{-1}$ ) <sup>a</sup> |
|--------------------------------------------------------|-------------------------------------------------------------------------|
| 50                                                     | 0.0023                                                                  |
| 100                                                    | 0.0043                                                                  |
| 200                                                    | 0.0075                                                                  |
| 500                                                    | 0.0159                                                                  |
| 1000                                                   | 0.0332                                                                  |
| 2000                                                   | 0.0316                                                                  |

<sup>a</sup> Experimental error is estimated at  $\pm 10\%$ .

**Table 14S:** Reaction rates of GGT, in the presence of 20 mM Gly-Gly at 37 °C at pH 7.5 (0.1 M Tris-HCl), with L-Glu( $\gamma$ -*p*-nitroanilide) as a function of substrate concentration.

| [L-Glu( $\gamma$ - <i>p</i> -nitroanilide)] ( $\mu$ M) | Rate ( $\text{M} \cdot \text{min}^{-1} \cdot \text{mg}^{-1}$ ) <sup>a</sup> |
|--------------------------------------------------------|-----------------------------------------------------------------------------|
| 50                                                     | 0.0183                                                                      |
| 100                                                    | 0.0340                                                                      |
| 200                                                    | 0.0480                                                                      |
| 500                                                    | 0.0739                                                                      |
| 1000                                                   | 0.0875                                                                      |
| 2000                                                   | 0.0900                                                                      |

<sup>a</sup> Experimental error is estimated at  $\pm 10\%$ .

**Table 15S:** Reaction rates of GGT, in the presence of 20 mM Gly-Gly at 37 °C at pH 8.5 (0.1 M Tris-HCl), with L-Glu( $\gamma$ -*p*-nitroanilide) as a function of substrate concentration.

| [L-Glu( $\gamma$ - <i>p</i> -nitroanilide)] ( $\mu$ M) | Rate ( $\text{M}\cdot\text{min}^{-1}\cdot\text{mg}^{-1}$ ) <sup>a</sup> |
|--------------------------------------------------------|-------------------------------------------------------------------------|
| 50                                                     | 0.0179                                                                  |
| 100                                                    | 0.0262                                                                  |
| 200                                                    | 0.0408                                                                  |
| 500                                                    | 0.0795                                                                  |
| 1000                                                   | 0.122                                                                   |
| 2000                                                   | 0.151                                                                   |

<sup>a</sup> Experimental error is estimated at  $\pm 10\%$ .

**Table 16S:** Reaction rates of GGT, in the presence of 20 mM Gly-Gly at 37 °C at pH 9.0 (0.1 M CHES), with L-Glu( $\gamma$ -*p*-nitroanilide) as a function of substrate concentration.

| [L-Glu( $\gamma$ - <i>p</i> -nitroanilide)] ( $\mu$ M) | Rate ( $\text{M}\cdot\text{min}^{-1}\cdot\text{mg}^{-1}$ ) <sup>a</sup> |
|--------------------------------------------------------|-------------------------------------------------------------------------|
| 50                                                     | 0.0081                                                                  |
| 100                                                    | 0.0123                                                                  |
| 200                                                    | 0.0241                                                                  |
| 500                                                    | 0.0513                                                                  |
| 1000                                                   | 0.0711                                                                  |
| 2000                                                   | 0.0760                                                                  |

<sup>a</sup> Experimental error is estimated at  $\pm 10\%$ .

**Table 17S:** Reaction rates of GGT, in the presence of 20 mM Gly-Gly at 37 °C at pH 9.5 (0.1 M CHES), with L-Glu( $\gamma$ -*p*-nitroanilide) as a function of substrate concentration.

| [L-Glu( $\gamma$ - <i>p</i> -nitroanilide)] ( $\mu$ M) | Rate ( $\text{M} \cdot \text{min}^{-1} \cdot \text{mg}^{-1}$ ) <sup>a</sup> |
|--------------------------------------------------------|-----------------------------------------------------------------------------|
| 50                                                     | 0.0041                                                                      |
| 100                                                    | 0.0099                                                                      |
| 200                                                    | 0.0147                                                                      |
| 500                                                    | 0.0329                                                                      |
| 1000                                                   | 0.0491                                                                      |
| 2000                                                   | 0.0545                                                                      |

<sup>a</sup> Experimental error is estimated at  $\pm 10\%$ .



**Table 18S:** Kinetic parameters ( $k_{\text{cat}}$  and  $K_{\text{M}}$ ) obtained according to Equation 4 for the reaction of GGT with L-Glu( $\gamma$ -*p*-nitroanilide), in the presence of 20 mM Gly-Gly at 37 °C, between pH 7.0 and 9.5.

| pH  | $K_{\text{M}}$<br>( $\mu\text{M}$ ) | $k_{\text{cat}}$<br>( $\text{s}^{-1}$ ) | $\log(k_{\text{cat}})^a$ |
|-----|-------------------------------------|-----------------------------------------|--------------------------|
| 7.0 | $843 \pm 445$                       | $391 \pm 78$                            | 2.593                    |
| 7.5 | $210 \pm 19$                        | $821 \pm 39$                            | 2.915                    |
| 8.0 | $468 \pm 50$                        | $1151 \pm 169$                          | 3.061                    |
| 8.5 | $774 \pm 87$                        | $1644 \pm 78$                           | 3.216                    |
| 9.0 | $540 \pm 115$                       | $783 \pm 78$                            | 2.894                    |
| 9.5 | $659 \pm 133$                       | $587 \pm 39$                            | 2.769                    |

<sup>a</sup> Experimental error is estimated at  $\pm 0.040$ .

**Table 19S:** Reaction rates of GGT, in the presence of 20 mM Gly-Gly at 37 °C at pH 7.0 (0.1 M MOPS), with L-Glu( $\gamma$ -anilide) as a function of substrate concentration.

| [L-Glu( $\gamma$ -anilide)] ( $\mu$ M) | Rate ( $\text{M}\cdot\text{min}^{-1}\cdot\text{mg}^{-1}$ ) <sup>a</sup> |
|----------------------------------------|-------------------------------------------------------------------------|
| 50                                     | 0.0051                                                                  |
| 150                                    | 0.0118                                                                  |
| 500                                    | 0.0234                                                                  |
| 1000                                   | 0.0315                                                                  |
| 2000                                   | 0.0388                                                                  |
| 4000                                   | 0.0360                                                                  |

<sup>a</sup> Experimental error is estimated at  $\pm 10\%$ .

**Table 20S:** Reaction rates of GGT, in the presence of 20 mM Gly-Gly at 37 °C at pH 7.5 (0.1 M Tris-HCl), with L-Glu( $\gamma$ -anilide) as a function of substrate concentration.

| [L-Glu( $\gamma$ -anilide)] ( $\mu$ M) | Rate ( $\text{M} \cdot \text{min}^{-1} \cdot \text{mg}^{-1}$ ) <sup>a</sup> |
|----------------------------------------|-----------------------------------------------------------------------------|
| 50                                     | 0.0029                                                                      |
| 150                                    | 0.0096                                                                      |
| 500                                    | 0.0264                                                                      |
| 1000                                   | 0.0373                                                                      |
| 2000                                   | 0.0454                                                                      |
| 4000                                   | 0.0463                                                                      |

<sup>a</sup> Experimental error is estimated at  $\pm 10\%$ .

**Table 21S:** Reaction rates of GGT, in the presence of 20 mM Gly-Gly at 37 °C at pH 8.5 (0.1 M Tris-HCl), with L-Glu( $\gamma$ -anilide) as a function of substrate concentration.

| [L-Glu( $\gamma$ -anilide)] ( $\mu$ M) | Rate ( $\text{M}\cdot\text{min}^{-1}\cdot\text{mg}^{-1}$ ) <sup>a</sup> |
|----------------------------------------|-------------------------------------------------------------------------|
| 50                                     | 0.0070                                                                  |
| 150                                    | 0.0098                                                                  |
| 500                                    | 0.0251                                                                  |
| 1000                                   | 0.0349                                                                  |
| 2000                                   | 0.0404                                                                  |
| 3000                                   | 0.0432                                                                  |

<sup>a</sup> Experimental error is estimated at  $\pm 10\%$ .

**Table 22S:** Reaction rates of GGT, in the presence of 20 mM Gly-Gly at 37 °C at pH 9.5 (0.1 M CHES), with L-Glu( $\gamma$ -anilide) as a function of substrate concentration.

| [L-Glu( $\gamma$ -anilide)] ( $\mu$ M) | Rate ( $\text{M}\cdot\text{min}^{-1}\cdot\text{mg}^{-1}$ ) <sup>a</sup> |
|----------------------------------------|-------------------------------------------------------------------------|
| 50                                     | 0.0007                                                                  |
| 150                                    | 0.0017                                                                  |
| 500                                    | 0.0049                                                                  |
| 1000                                   | 0.0072                                                                  |
| 2000                                   | 0.0116                                                                  |
| 3000                                   | 0.0133                                                                  |

<sup>a</sup> Experimental error is estimated at  $\pm 10\%$ .

**Table 23S:** Kinetic parameters ( $k_{\text{cat}}$  and  $K_{\text{M}}$ ) obtained according to Equation 4 for the reaction of GGT with L-Glu( $\gamma$ -anilide), in the presence of 20 mM Gly-Gly at 37 °C, between pH 7.0 and 9.5.

| pH  | $K_{\text{M}}$<br>( $\mu\text{M}$ ) | $k_{\text{cat}}$<br>( $\text{s}^{-1}$ ) | $\log(k_{\text{cat}})^a$ |
|-----|-------------------------------------|-----------------------------------------|--------------------------|
| 7.0 | $365 \pm 76$                        | $635 \pm 35$                            | 2.803                    |
| 7.5 | $593 \pm 107$                       | $840 \pm 49$                            | 2.924                    |
| 8.0 | $450 \pm 45$                        | $449 \pm 28$                            | 2.652                    |
| 8.5 | $501 \pm 75$                        | $406 \pm 18$                            | 2.609                    |
| 9.5 | $1441 \pm 344$                      | $174 \pm 17$                            | 2.241                    |

<sup>a</sup> Experimental error is estimated at  $\pm 0.040$ .

**Table 24S:** Reaction rates of GGT, in the presence of 20 mM Gly-Gly at 37 °C at pH 7.0 (0.1 M MOPS), with L-Glu( $\gamma$ -*p*-methoxyanilide) as a function of substrate concentration.

| [L-Glu( $\gamma$ - <i>p</i> -methoxyanilide)] ( $\mu$ M) | Rate ( $\text{M}\cdot\text{min}^{-1}\cdot\text{mg}^{-1}$ ) <sup>a</sup> |
|----------------------------------------------------------|-------------------------------------------------------------------------|
| 50                                                       | 0.0013                                                                  |
| 150                                                      | 0.0064                                                                  |
| 500                                                      | 0.0216                                                                  |
| 1000                                                     | 0.0357                                                                  |
| 2000                                                     | 0.0458                                                                  |
| 3000                                                     | 0.0510                                                                  |

<sup>a</sup> Experimental error is estimated at  $\pm 10\%$ .

**Table 25S:** Reaction rates of GGT, in the presence of 20 mM Gly-Gly at 37 °C at pH 7.5 (0.1 M Tris-HCl), with L-Glu( $\gamma$ -*p*-methoxyanilide) as a function of substrate concentration.

| [L-Glu( $\gamma$ - <i>p</i> -methoxyanilide)] ( $\mu$ M) | Rate ( $\text{M}\cdot\text{min}^{-1}\cdot\text{mg}^{-1}$ ) <sup>a</sup> |
|----------------------------------------------------------|-------------------------------------------------------------------------|
| 50                                                       | 0.0043                                                                  |
| 150                                                      | 0.0137                                                                  |
| 500                                                      | 0.0327                                                                  |
| 1000                                                     | 0.0469                                                                  |
| 2000                                                     | 0.0568                                                                  |
| 3000                                                     | 0.0633                                                                  |

<sup>a</sup> Experimental error is estimated at  $\pm 10\%$ .



**Table 26S:** Reaction rates of GGT, in the presence of 20 mM Gly-Gly at 37 °C at pH 8.5 (0.1 M Tris-HCl), with L-Glu( $\gamma$ -*p*-methoxyanilide) as a function of substrate concentration.

| [L-Glu( $\gamma$ - <i>p</i> -methoxyanilide)] ( $\mu$ M) | Rate ( $\text{M}\cdot\text{min}^{-1}\cdot\text{mg}^{-1}$ ) <sup>a</sup> |
|----------------------------------------------------------|-------------------------------------------------------------------------|
| 150                                                      | 0.0146                                                                  |
| 500                                                      | 0.0267                                                                  |
| 1000                                                     | 0.0485                                                                  |
| 2000                                                     | 0.0692                                                                  |
| 3000                                                     | 0.0777                                                                  |

<sup>a</sup> Experimental error is estimated at  $\pm 10\%$ .

**Table 27S:** Reaction rates of GGT, in the presence of 20 mM Gly-Gly at 37 °C at pH 9.0 (0.1 M CHES), with L-Glu( $\gamma$ -*p*-methoxyanilide) as a function of substrate concentration.

| [L-Glu( $\gamma$ - <i>p</i> -methoxyanilide)] ( $\mu$ M) | Rate ( $\text{M}\cdot\text{min}^{-1}\cdot\text{mg}^{-1}$ ) <sup>a</sup> |
|----------------------------------------------------------|-------------------------------------------------------------------------|
| 50                                                       | 0.0011                                                                  |
| 150                                                      | 0.0026                                                                  |
| 500                                                      | 0.0086                                                                  |
| 1000                                                     | 0.0155                                                                  |
| 2000                                                     | 0.0321                                                                  |
| 3000                                                     | 0.0395                                                                  |
| 4500                                                     | 0.0431                                                                  |

<sup>a</sup> Experimental error is estimated at  $\pm 10\%$ .

**Table 28S:** Kinetic parameters ( $k_{\text{cat}}$  and  $K_{\text{M}}$ ) obtained according to Equation 4 for the reaction of GGT with L-Glu( $\gamma$ -*p*-methoxyanilide), in the presence of 20 mM Gly-Gly at 37 °C, between pH 7.0 and 9.0.

| pH  | $K_{\text{M}}$<br>( $\mu\text{M}$ ) | $k_{\text{cat}}$<br>( $\text{s}^{-1}$ ) | $\log(k_{\text{cat}})^a$ |
|-----|-------------------------------------|-----------------------------------------|--------------------------|
| 7.0 | $1109 \pm 175$                      | $547 \pm 35$                            | 2.738                    |
| 7.5 | $692 \pm 42$                        | $745 \pm 14$                            | 2.872                    |
| 8.0 | $953 \pm 28$                        | $971 \pm 50$                            | 2.987                    |
| 8.5 | $1424 \pm 277$                      | $1007 \pm 89$                           | 3.003                    |
| 9.0 | $3015 \pm 862$                      | $640 \pm 93$                            | 2.806                    |

<sup>a</sup> Experimental error is estimated at  $\pm 0.040$ .

**Table 29S:** Reaction rates of GGT, in the presence of 20 mM Gly-Gly at 15 °C at different pH levels, with L-Glu( $\gamma$ -*p*-nitroanilide) as a function of substrate concentration.

| [L-Glu( $\gamma$ - <i>p</i> -nitroanilide)]<br>( $\mu$ M) | Rate <sup>a</sup> at pH<br>8.75 ( $\mu$ M/min) | Rate <sup>a</sup> at pH<br>9.00 ( $\mu$ M/min) | Rate <sup>a</sup> at pH<br>9.25 ( $\mu$ M/min) | Rate <sup>a</sup> at pH<br>9.50 ( $\mu$ M/min) |
|-----------------------------------------------------------|------------------------------------------------|------------------------------------------------|------------------------------------------------|------------------------------------------------|
| 200                                                       | 0.548                                          | 0.480                                          | 0.341                                          | 0.260                                          |
| 500                                                       | 1.18                                           | 0.887                                          | 0.717                                          | 0.538                                          |
| 750                                                       | 1.51                                           | 1.27                                           | 0.910                                          | 0.752                                          |
| 1500                                                      | 1.94                                           | 1.56                                           | 1.22                                           | 0.932                                          |
| 2500                                                      | 2.03                                           | 1.70                                           | 1.24                                           | 0.949                                          |
| 3980                                                      | 2.09                                           | 1.69                                           | 1.27                                           | 0.868                                          |

<sup>a</sup> Experimental error is estimated at  $\pm 10\%$ .

**Table 30S:** Reaction rates of GGT, in the presence of 20 mM Gly-Gly at 25 °C at different pH levels, with L-Glu( $\gamma$ -*p*-nitroanilide) as a function of substrate concentration.

| [L-Glu( $\gamma$ - <i>p</i> -nitroanilide)]<br>( $\mu$ M) | Rate <sup>a</sup> at pH<br>8.75 ( $\mu$ M/min) | Rate <sup>a</sup> at pH<br>9.00 ( $\mu$ M/min) | Rate <sup>a</sup> at pH<br>9.25 ( $\mu$ M/min) | Rate <sup>a</sup> at pH<br>9.50 ( $\mu$ M/min) |
|-----------------------------------------------------------|------------------------------------------------|------------------------------------------------|------------------------------------------------|------------------------------------------------|
| 200                                                       | 1.04                                           | 0.690                                          | 0.489                                          | 0.440                                          |
| 500                                                       | 2.04                                           | 1.52                                           | 1.14                                           | 0.897                                          |
| 750                                                       | 2.57                                           | 2.22                                           | 1.48                                           | 1.16                                           |
| 1500                                                      | 3.34                                           | 2.66                                           | 2.06                                           | 1.52                                           |
| 2500                                                      | 3.68                                           | 3.16                                           | 2.14                                           | 1.75                                           |
| 3980                                                      | 3.48                                           | 3.19                                           | 2.15                                           | 1.59                                           |

<sup>a</sup> Experimental error is estimated at  $\pm 10\%$ .

**Table 31S:** Reaction rates of GGT, in the presence of 20 mM Gly-Gly at 30 °C at different pH levels, with L-Glu( $\gamma$ -*p*-nitroanilide) as a function of substrate concentration.

| [L-Glu( $\gamma$ - <i>p</i> -nitroanilide)]<br>( $\mu$ M) | Rate <sup>a</sup> at pH<br>8.75 ( $\mu$ M/min) | Rate <sup>a</sup> at pH<br>9.00 ( $\mu$ M/min) | Rate <sup>a</sup> at pH<br>9.25 ( $\mu$ M/min) | Rate <sup>a</sup> at pH<br>9.50 ( $\mu$ M/min) |
|-----------------------------------------------------------|------------------------------------------------|------------------------------------------------|------------------------------------------------|------------------------------------------------|
| 200                                                       | 1.30                                           | 0.924                                          | 0.683                                          | 0.486                                          |
| 500                                                       | 2.61                                           | 2.01                                           | 1.46                                           | 0.972                                          |
| 750                                                       | 3.32                                           | 2.51                                           | 1.94                                           | 1.40                                           |
| 1500                                                      | 4.17                                           | 3.79                                           | 2.64                                           | 1.84                                           |
| 2500                                                      | 4.34                                           | 4.13                                           | 2.78                                           | 1.97                                           |
| 3980                                                      | 4.39                                           | 3.86                                           | 2.78                                           | 1.88                                           |

<sup>a</sup> Experimental error is estimated at  $\pm 10$  %.

**Table 32S:** Reaction rates of GGT, in the presence of 20 mM Gly-Gly at 37 °C at different pH levels, with L-Glu( $\gamma$ -*p*-nitroanilide) as a function of substrate concentration.

| [L-Glu( $\gamma$ - <i>p</i> -nitroanilide)]<br>( $\mu$ M) | Rate <sup>a</sup> at pH<br>8.75 ( $\mu$ M/min) | Rate <sup>a</sup> at pH<br>9.00 ( $\mu$ M/min) | Rate <sup>a</sup> at pH<br>9.25 ( $\mu$ M/min) | Rate <sup>a</sup> at pH<br>9.50 ( $\mu$ M/min) |
|-----------------------------------------------------------|------------------------------------------------|------------------------------------------------|------------------------------------------------|------------------------------------------------|
| 200                                                       | 1.60                                           | 1.12                                           | 0.808                                          | 0.590                                          |
| 500                                                       | 3.11                                           | 2.57                                           | 1.82                                           | 1.26                                           |
| 750                                                       | 4.37                                           | 3.48                                           | 2.38                                           | 1.63                                           |
| 1500                                                      | 5.65                                           | 4.95                                           | 3.23                                           | 2.24                                           |
| 2500                                                      | 6.08                                           | 5.02                                           | 3.56                                           | 2.49                                           |
| 3980                                                      | 5.91                                           | 5.54                                           | 3.57                                           | 2.34                                           |

<sup>a</sup> Experimental error is estimated at  $\pm 10$  %.

**Table 33S:** Reaction rates of GGT, in the presence of 20 mM Gly-Gly at 40 °C at different pH levels, with L-Glu( $\gamma$ -*p*-nitroanilide) as a function of substrate concentration.

| [L-Glu( $\gamma$ - <i>p</i> -nitroanilide)]<br>( $\mu$ M) | Rate <sup>a</sup> at pH<br>8.75 ( $\mu$ M/min) | Rate <sup>a</sup> at pH<br>9.00 ( $\mu$ M/min) | Rate <sup>a</sup> at pH<br>9.25 ( $\mu$ M/min) | Rate <sup>a</sup> at pH<br>9.50 ( $\mu$ M/min) |
|-----------------------------------------------------------|------------------------------------------------|------------------------------------------------|------------------------------------------------|------------------------------------------------|
| 200                                                       | 1.81                                           | 1.37                                           | 0.933                                          | 0.573                                          |
| 500                                                       | 3.35                                           | 3.10                                           | 1.93                                           | 1.23                                           |
| 750                                                       | 4.58                                           | 4.03                                           | 2.55                                           | 1.64                                           |
| 1500                                                      | 6.20                                           | 5.36                                           | 3.57                                           | 2.27                                           |
| 2500                                                      | 6.47                                           | 6.03                                           | 3.92                                           | 2.60                                           |
| 3980                                                      | 6.42                                           | 5.74                                           | 4.45                                           | 2.39                                           |

<sup>a</sup> Experimental error is estimated at  $\pm 10\%$ .
